# Supplementary material
Source: publisher site journal article supplement (https://www.dovepress.com/article/323321)

**Supplementary table S1. Multivariate analysis for cancer specific survival in 311 PSCC patients**

| Clinical pathological data | P value | Hazard ratio | 95% CI |
| --- | --- | --- | --- |
| Glans of penisa | 0.837 | 1.245 | 0.154-10.066 |
| Body of penisa | 0.464 | 2.489 | 0.217-28.505 |
| T2 (8th edition)b | 0.814 | 1.117 | 0.444-2.808 |
| T3 (8th edition)b | 0.490 | 1.382 | 0.552-3.460 |
| T4 (8th edition)b | 0.096 | 3.114 | 0.816-11.883 |
| Moderately differentiatedc | 0.139 | 2.006 | 0.797-5.050 |
| Poorly/ undifferentiatedc | 0.073 | 2.523 | 0.918-6.936 |
| LVI present/ identifiedd | 0.236 | 1.510 | 0.763-2.989 |
| cN+e | 0.090 | 2.674 | 0.858-8.340 |
| pN1e | 0.879 | 1.108 | 0.297-4.142 |
| pN2e | 0.001 | 9.977 | 4.543-21.970 |
| pN3e | 0.001 | 32.569 | 12.529-84.665 |
| Glans of penisa | 0.609 | 1.693 | 0.224-12.771 |
| Body of penisa | 0.375 | 2.822 | 0.285-27.888 |
| Moderately differentiatedc | 0.726 | 1.173 | 0.481-2.861 |
| Poorly/ undifferentiatedc | 0.087 | 2.261 | 0.887-5.765 |
| LVI present/ identifiedd | 0.107 | 1.706 | 0.890-3.267 |
| AJCC group II (8th editions)f | 0.088 | 3.918 | 0.816-18.801 |
| AJCC group III (8th editions)f | 0.001 | 12.686 | 2.776-57.963 |
| AJCC group IV (8th editions)f | 0.001 | 50.341 | 10.386-244.013 |

a: reference group is disease without penile body invasion; b: reference group is T1; c: reference group is nuclear well differentiated group; d: LVI negative; e: reference group is cN0+pN0; f: reference group is AJCC group I. PSCC: penile squamous cell carcinoma; CI: confidence interval.

**Supplementary Figure legends**

**Supplementary Figure 1:** Calibration curves of 2-year survival for nomogram 1.
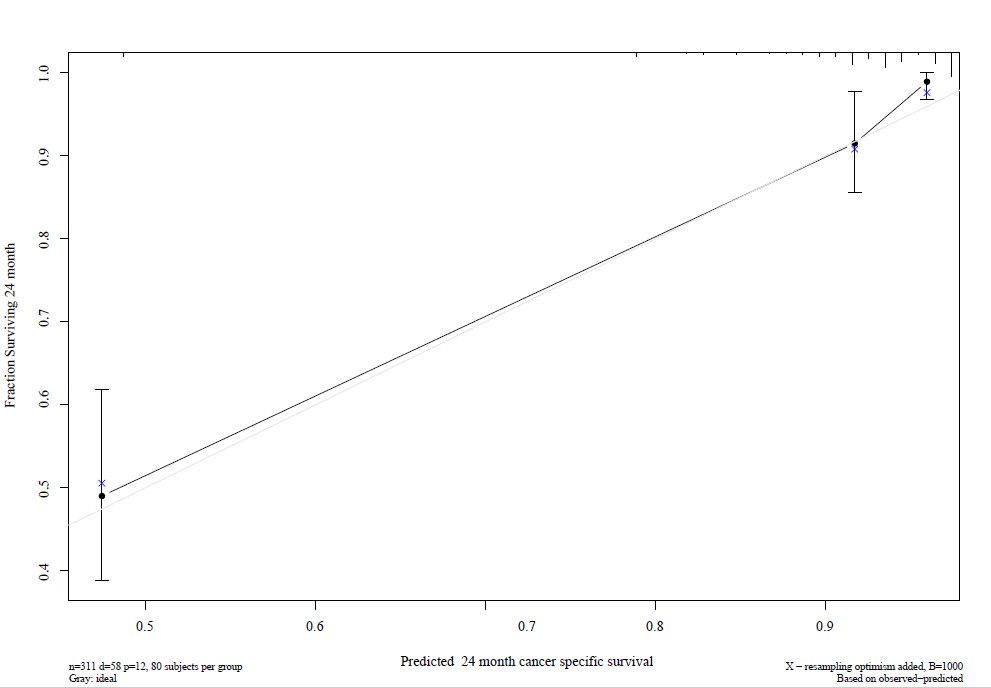


**Supplementary Figure 2:** Calibration curves of 2-year survival for nomogram 2.


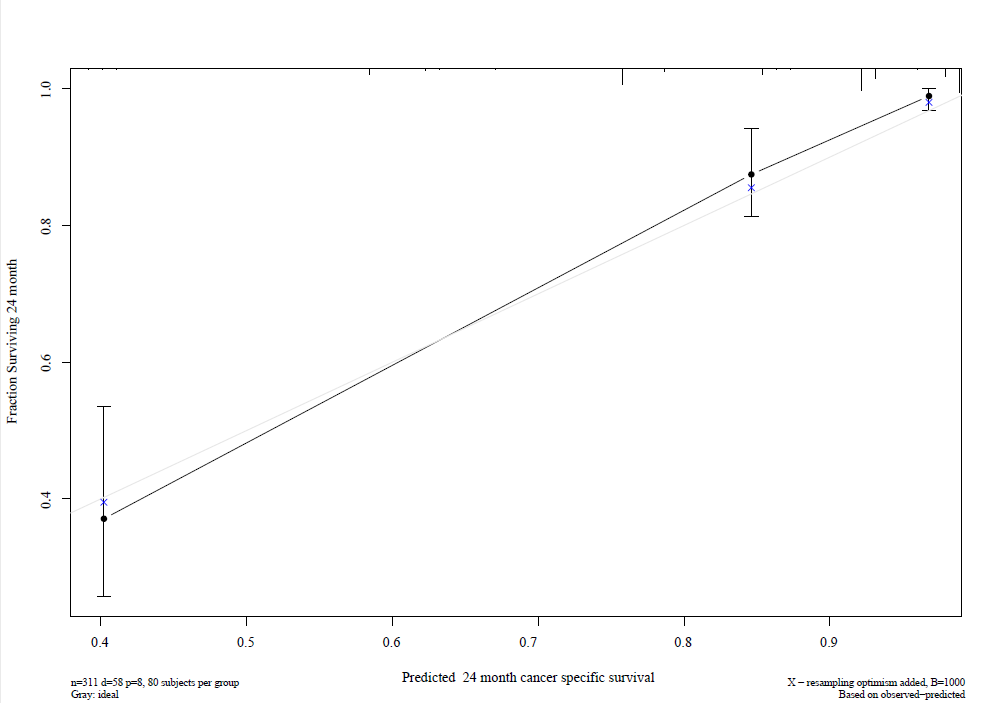

Supplement: Supplementary file 1 [file get_supplementary_file.php]
